# Supplementary material
Source: PubMed Central journal article supplement (PMC3257811)
Supplement: NIHMS242797-supplement-01.pdf [file NIHMS242797-supplement-01.pdf]

Online Table 1: Descriptive characteristics of participants, among the cohort\* and for those who were eligible but not in the cohort

|                                                            | 3-months Postpartum |    |                                        |    |          | 12-months Postpartum |    |                                        |    |          |
|------------------------------------------------------------|---------------------|----|----------------------------------------|----|----------|----------------------|----|----------------------------------------|----|----------|
|                                                            | Cohort* (n=80)      |    | Eligible but not in the cohort (n=236) |    | p-value^ | Cohort* (n=80)       |    | Eligible but not in the cohort (n=331) |    | p-value^ |
|                                                            | n                   | %  | n                                      | %  |          | n                    | %  | n                                      | %  |          |
| <u>Age in years</u>                                        |                     |    |                                        |    |          |                      |    |                                        |    |          |
| 17-29                                                      | 32                  | 40 | 102                                    | 43 | 0.62     | 29                   | 36 | 95                                     | 29 | 0.19     |
| >=30                                                       | 48                  | 60 | 134                                    | 57 |          | 51                   | 64 | 236                                    | 71 |          |
| <u>Marital status</u>                                      |                     |    |                                        |    |          |                      |    |                                        |    |          |
| Not married                                                | 7                   | 9  | 51                                     | 22 | 0.01     | 9                    | 11 | 48                                     | 15 | 0.45     |
| Married                                                    | 73                  | 91 | 185                                    | 78 |          | 71                   | 89 | 283                                    | 85 |          |
| <u>Race/Ethnicity (assessed once during pregnancy)</u>     |                     |    |                                        |    |          |                      |    |                                        |    |          |
| Nonhispanic White                                          | 64                  | 80 | 171                                    | 72 | 0.37     | 64                   | 80 | 257                                    | 78 | 0.87     |
| Nonhispanic Black                                          | 8                   | 10 | 41                                     | 17 |          | 8                    | 10 | 41                                     | 12 |          |
| Other                                                      | 8                   | 10 | 24                                     | 10 |          | 8                    | 10 | 31                                     | 9  |          |
| <u>Education in years (assessed once during pregnancy)</u> |                     |    |                                        |    |          |                      |    |                                        |    |          |
| <=12                                                       | 11                  | 14 | 41                                     | 17 | 0.42     | 11                   | 14 | 45                                     | 14 | 0.71     |
| 13-15                                                      | 16                  | 20 | 49                                     | 21 |          | 16                   | 20 | 56                                     | 17 |          |
| >=16                                                       | 53                  | 66 | 146                                    | 62 |          | 53                   | 66 | 230                                    | 69 |          |
| <u>General health (assessed once during pregnancy)</u>     |                     |    |                                        |    |          |                      |    |                                        |    |          |
| Excellent                                                  | 26                  | 33 | 86                                     | 36 | 0.25     | 26                   | 33 | 122                                    | 37 | 0.09     |
| Very Good                                                  | 31                  | 39 | 97                                     | 41 |          | 31                   | 39 | 145                                    | 44 |          |
| Good                                                       | 18                  | 23 | 44                                     | 19 |          | 18                   | 23 | 53                                     | 16 |          |
| Fair/Poor                                                  | 5                   | 6  | 9                                      | 4  |          | 5                    | 6  | 10                                     | 3  |          |
| <u>Body mass index (kg/m^2)</u>                            |                     |    |                                        |    |          |                      |    |                                        |    |          |
| Low or Normal (<25.0)                                      | 34                  | 43 | 101                                    | 42 | 0.95     | 39                   | 49 | 181                                    | 58 | 0.12     |
| Overweight (25.0 to <30.0)                                 | 23                  | 29 | 68                                     | 29 |          | 20                   | 25 | 76                                     | 24 |          |

|                                                           |             |                     |             |                     |                 |             |                     |             |                     |                 |
|-----------------------------------------------------------|-------------|---------------------|-------------|---------------------|-----------------|-------------|---------------------|-------------|---------------------|-----------------|
| Obese ( $\geq 30.0$ )                                     | 23          | 29                  | 67          | 28                  |                 | 21          | 26                  | 60          | 19                  |                 |
| <u>Parity (assessed once during pregnancy)</u>            |             |                     |             |                     | 0.94            |             |                     |             |                     | 0.53            |
| 0                                                         | 38          | 48                  | 112         | 47                  |                 | 38          | 48                  | 163         | 49                  |                 |
| 1                                                         | 27          | 34                  | 82          | 35                  |                 | 27          | 34                  | 119         | 36                  |                 |
| 2                                                         | 11          | 14                  | 26          | 11                  |                 | 11          | 14                  | 35          | 11                  |                 |
| 3+                                                        | 4           | 5                   | 16          | 7                   |                 | 4           | 5                   | 14          | 4                   |                 |
| <u>Number of children in home</u>                         |             |                     |             |                     | 0.92            |             |                     |             |                     | 0.64            |
| 1                                                         | 37          | 46                  | 108         | 46                  |                 | 37          | 46                  | 154         | 47                  |                 |
| 2                                                         | 29          | 36                  | 90          | 38                  |                 | 28          | 35                  | 128         | 39                  |                 |
| 3+                                                        | 14          | 18                  | 38          | 16                  |                 | 15          | 19                  | 49          | 15                  |                 |
| <u>Working status</u>                                     |             |                     |             |                     | 0.74            |             |                     |             |                     | 0.95            |
| Not employed                                              | 40          | 50                  | 113         | 48                  |                 | 28          | 35                  | 117         | 35                  |                 |
| Employed                                                  | 40          | 50                  | 123         | 52                  |                 | 52          | 65                  | 214         | 65                  |                 |
| <u>Breastfeeding</u>                                      |             |                     |             |                     | 0.07            |             |                     |             |                     | 0.07            |
| No                                                        | 21          | 26                  | 88          | 37                  |                 | 52          | 65                  | 248         | 75                  |                 |
| Yes                                                       | 59          | 74                  | 148         | 63                  |                 | 28          | 35                  | 83          | 25                  |                 |
|                                                           | <u>Mean</u> | <u>Median (IQR)</u> | <u>Mean</u> | <u>Median (IQR)</u> | <u>p-value#</u> | <u>Mean</u> | <u>Median (IQR)</u> | <u>Mean</u> | <u>Median (IQR)</u> | <u>p-value#</u> |
| <u>Self-reported physical activity #</u>                  |             |                     |             |                     |                 |             |                     |             |                     |                 |
| Total moderate to vigorous physical activity (hours/week) | 3.3         | 1.3 (0.0-3.9)       | 2.9         | 1.1 (0.0-4.5)       | 0.83            | 2.6         | 1.0 (0.0-3.9)       | 3.3         | 1.7 (0.0-4.0)       | 0.09            |
| Total physical activity (hours/week)                      | 6.4         | 4.0 (1.7-7.6)       | 6.3         | 4.1 (1.7-8.3)       | 0.97            | 7.1         | 3.5 (1.2-7.6)       | 7.0         | 4.6 (2.2-9.0)       | 0.08            |

^ p-values on categorical measures are from chi-squared tests.

# p-values on continuous measures are from nonparametric Mann-Whitney tests.

\*The cohort was defined as participants that completed the accelerometer portion of the study at both 3- and 12-months postpartum.

At 3-months postpartum, those eligible but did not participate was (316-80=236) and at 12-months postpartum was (411-80=331).

IQR=interquartile range

Online Table 2: Accelerometry results for compliant participants at 3- and 12-months postpartum, with and without imputation

|                                               | 3-months Postpartum |        |            |                                         |        |             | 12-months Postpartum    |        |            |                                         |        |             |
|-----------------------------------------------|---------------------|--------|------------|-----------------------------------------|--------|-------------|-------------------------|--------|------------|-----------------------------------------|--------|-------------|
|                                               | Compliant* (n=153)  |        |            | Compliant Data with Imputation* (n=153) |        |             | Compliant Data* (n=185) |        |            | Compliant Data with Imputation* (n=185) |        |             |
|                                               | Mean                | Median | IQR        | Mean                                    | Median | IQR         | Mean                    | Median | IQR        | Mean                                    | Median | IQR         |
| <u>Counts per minute</u>                      | 304                 | 290    | 230-362    | 365                                     | 357    | 322-405     | 335                     | 320    | 250-402    | 388                                     | 381    | 333-436     |
| <u>Absolute values (minutes per day):</u>     |                     |        |            |                                         |        |             |                         |        |            |                                         |        |             |
| <u>Troiano et al cutpoints</u>                |                     |        |            |                                         |        |             |                         |        |            |                                         |        |             |
| Light                                         | 793                 | 799    | 725-858    | 1122                                    | 1126   | 1116-1131   | 812                     | 815    | 754-871    | 1118                                    | 1121   | 1111-1129   |
| Moderate                                      | 16                  | 13     | 8-21       | 17                                      | 14     | 9-22        | 19                      | 17     | 10-26      | 20                                      | 18     | 11-26       |
| Vigorous                                      | 1                   | 0      | 0-1        | 1                                       | 0      | 0-0         | 2                       | 0      | 0-1        | 2                                       | 0      | 0-1         |
| <u>Swartz et al cutpoints</u>                 |                     |        |            |                                         |        |             |                         |        |            |                                         |        |             |
| Light                                         | 678                 | 684    | 612-741    | 871                                     | 874    | 842-910     | 682                     | 685    | 621-746    | 858                                     | 865    | 821-903     |
| Moderate                                      | 130                 | 122    | 97-153     | 267                                     | 263    | 229-297     | 148                     | 143    | 111-173    | 280                                     | 272    | 236-316     |
| Vigorous                                      | 2                   | 0      | 0-2        | 2                                       | 0      | 0-1         | 3                       | 0      | 0-3        | 2                                       | 0      | 0-3         |
| <u>Sedentary</u>                              | 459                 | 454    | 404-519    | 561                                     | 567    | 518-606     | 445                     | 450    | 379-501    | 537                                     | 536    | 485-586     |
| <u>Steps per day - uncensored<sup>^</sup></u> | 10726               | 8423   | 7158-10414 | 24766                                   | 22030  | 19731-25187 | 10600                   | 9895   | 8081-11803 | 23413                                   | 22261  | 19454-25735 |
| Light                                         | 9283                | 7359   | 6182-8368  | 23243                                   | 20451  | 18252-23382 | 8839                    | 8075   | 6785-9812  | 21589                                   | 20503  | 17686-23751 |
| Moderate                                      | 1332                | 975    | 521-1675   | 1378                                    | 1018   | 642-1746    | 1559                    | 1220   | 684-2153   | 1604                                    | 1308   | 776-2079    |
| Vigorous                                      | 388                 | 0      | 0-166      | 379                                     | 0      | 0-148       | 519                     | 0      | 0-164      | 497                                     | 0      | 0-163       |
| <u>Steps per day - censored<sup>^#</sup></u>  | 6646                | 5417   | 4275-6996  | 13799                                   | 12559  | 11359-14582 | 7060                    | 6558   | 5088-8404  | 13805                                   | 13272  | 11506-15367 |
| Light                                         | 5203                | 4171   | 3477-5051  | 12276                                   | 11060  | 9894-12677  | 5299                    | 4633   | 3821-6098  | 11981                                   | 11561  | 9745-13337  |

\*A standard measurement day was defined as the length of time in which  $\geq 70\%$  of the sample was wearing the accelerometer, separately for weekdays and weekends. Participants were classified as having compliant accelerometry data if they had nonmissing counts over at least 70% of a standard measurement day for at least 3 compliant weekdays and 1 compliant weekend.

^ Intensity levels defined using Troiano et al cutpoints

# Steps taken at <500 counts/minute were censored; this did not affect steps taken at moderate or vigorous levels.

The cutpoints on accelerometer counts per minute were defined as follows:

Swartz et al: 574-4944 (moderate);  $\geq 4945$  (vigorous)

Troiano et al: 2020-5998 (moderate);  $\geq 5999$  (vigorous)

Sedentary behavior:  $\leq 100$  per Matthews et al.

IQR = interquartile range
